# Supplementary material for: Exploring Virome Diversity in Public Data in South America as an Approach for Detecting Viral Sources From Potentially Emerging Viruses
Source: PubMed Central journal article supplement (PMC8814814; doi:10.3389/fgene.2021.722857), 2022-01-21

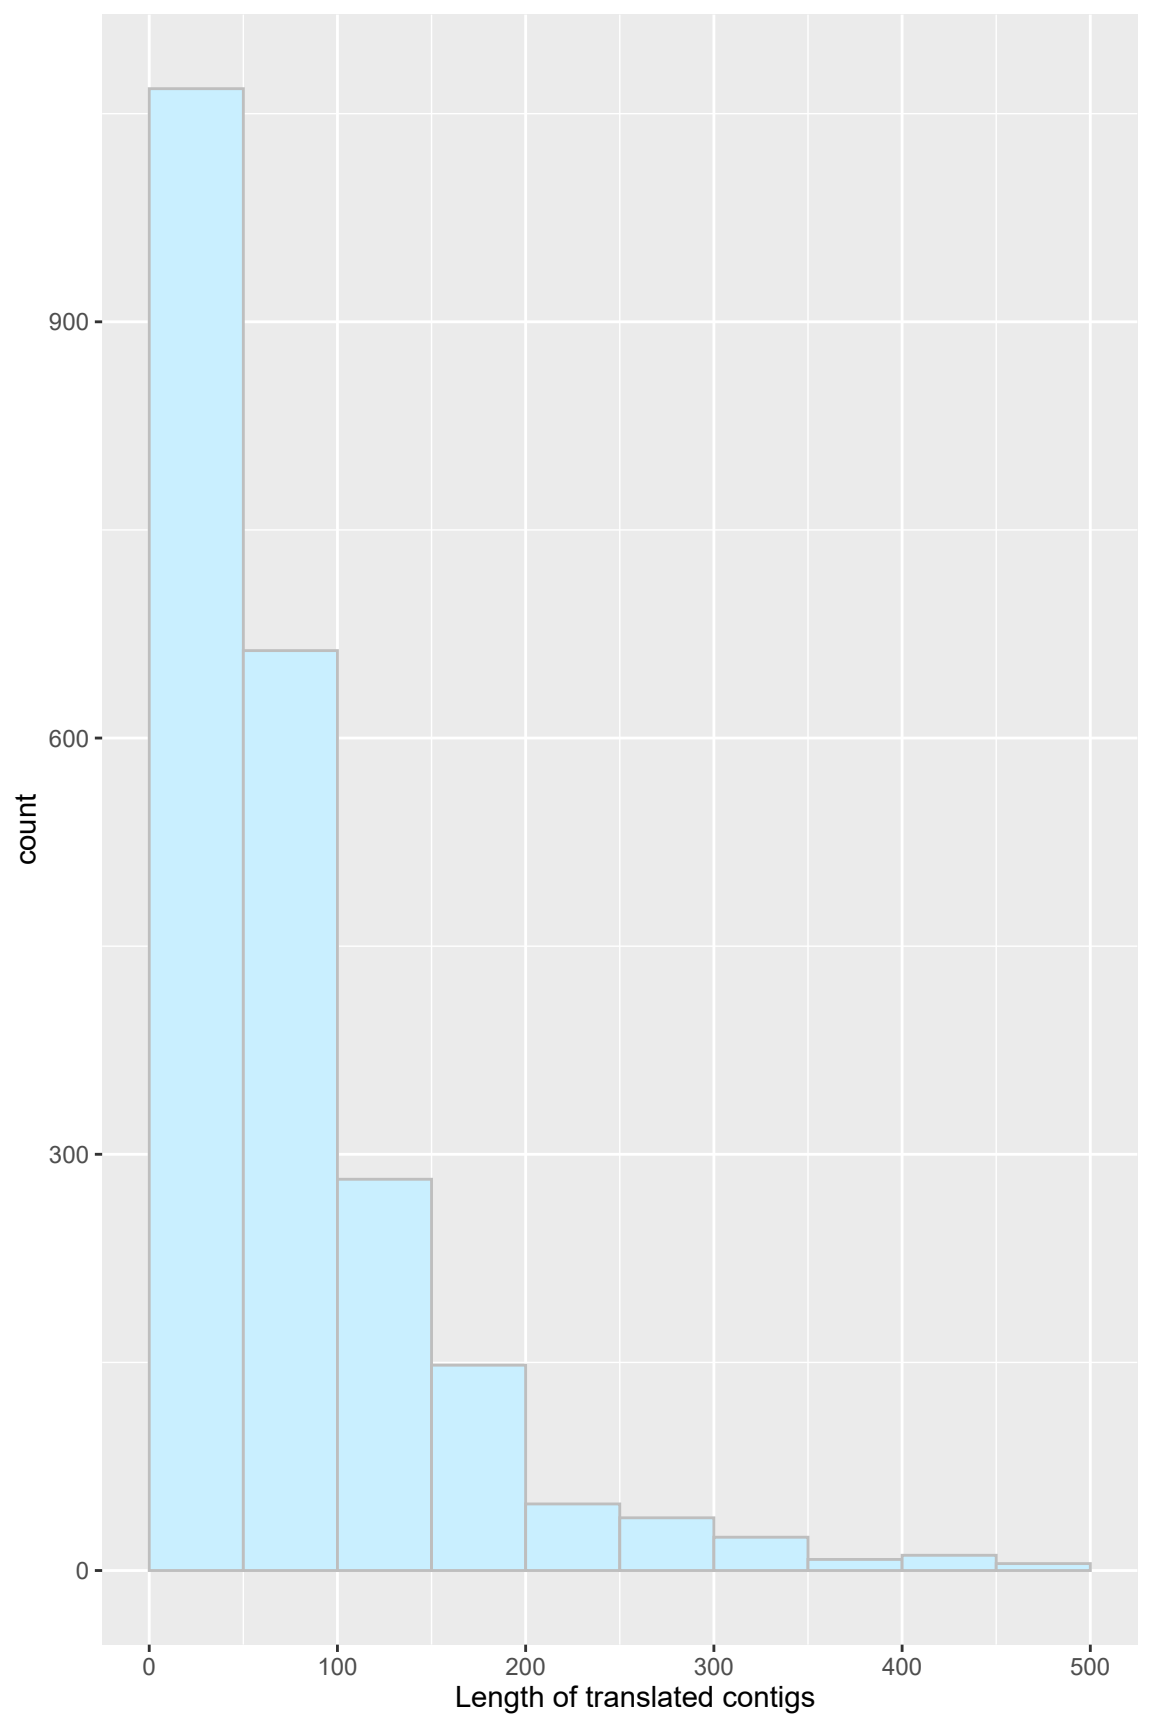

Supplement: Image6.pdf [file Image6.pdf]
